# Supplementary material
Source: PubMed Central journal article supplement (PMC5499236)
Supplement: NIHMS863911-supplement-2.pdf [file NIHMS863911-supplement-2.pdf]

Oct.bim. 1 -----DPGWVLLLLLSPMFLIATLAILANDSGASSDRRSDLPSATSLAASRN  
Oct.vul. 1 MKHADKTVQLLENLRIISEHRRRSIAENLTYRNARTEPNYRRASVAVPSWSGQFLSGASSDRRSDLPSATSLAASRN  
Sepia 1 MKHADKSHIMLLENLRIISEHRRRSIAENIYSEKNFR---RRASVAVPSWSGSPFLSGASSDRGSDLTSATSLAASRN  
Squid 1 -----MFYHSSGAGSDRGSDLTSATSLAASRN

Oct.bim. 48 ASLRHQQQQHPTSIGIRKRDPTSSANTAAADHHHHFPHHSHHHHHHRQHPPPLSSTSTTAGDPTTATSGSFRAKQSGRS  
Oct.vul. 81 ASLRHQQQQHPTSIGIRKRDPTSSANTAAADHHHHFPHHSHHHHHHRQHPPPLSSTSTTAGDPTTATSGSFRAKQSGRS  
Sepia 78 ASLRHQQQQHPTSSVGIRKRDATLSANTASADHHHHPHHPHHPHHPHHPHPPPLSSTTTSTRDPASATSGSVRK-QSGRS  
Squid 28 ASLRHQQQQHPTSSVGIRKRDPSLANTASADHHHHFPHHHPHHPHHPHHPHPPPLSSTTTSTRDPASATSGSVRK-QSGRS

Oct.bim. 128 EVKIADPVVTCVSGS--LQLAASPAVVQPPGSIIPAGNNNLPLQGGGGVGGGGVGSSEVVGVGDMSSALQRPFYAT  
Oct.vul. 161 EVKIADPVVTSVGS--LQLAASPAVVQPPGSIIPAGNNNLPLQGGGSGVGGGSGVSGVVGVGDMSSALQRPFYAT  
Sepia 157 EVKIADPPIVSSGGGGSIQLAASPAVVQPTGSIIPAGNNNLPLQGGDGGGGSGGIGGGVVGVGDMSSALQRPFYAA  
Squid 107 EVKIADPPIVSSGGGG-SIQLAASPAVVQPTGSIIPAGNNNLPLQGGGGGGGGGSGGSGVVGVGDMSSALQRPFYAA

Oct.bim. 206 SSI GSPDPASILRSREVS KRVILNVGGVKHEVLWRTLDRMPHTRLGKLRDCNTHDAIVDLCCDYS LAENEYFFDRHPRS  
Oct.vul. 239 SSI GSPDPASILRSREVS KRVILNVGGVKHEVLWRTLDRMPHTRLGKLRDCNTHDAIVDLCCDYS LAENEYFFDRHPRS  
Sepia 237 SSI GSPDPASILRSREVS KRVILNVGGVKHEVLWRTLDRMPHTRLGKLRDCNTHDAIVDLCCDYS LAENEYFFDRHPRS  
Squid 186 SSI GSPDPASILRSREVS KRVILNVGGVKHEVLWRTLDRMPHTRLGKLRDCNTHDAIVDLCCDYS LAENEYFFDRHPRS

Oct.bim. 286 FASILNFYRTGKHLHVEEMCVLAFSEDELEYWGVDELYLES CCQHXYHQKKEHVFE EIRKEAESLRKGEDEDFGTGSFAKW  
Oct.vul. 319 FASILNFYRTGKHLHVEEMCVLAFSEDELEYWGVDELYLES CCQHXYHQKKEHVFE EIRKEAESLRKGEDEDFGTGSFAKW  
Sepia 317 FASILNFYRTGKHLHVEEMCVLAFSEDELEYWGVDELYLES CCQHXYHQKKEHVFE EIRKEAESLRKGEDEDFGTGSFAKW  
Squid 266 FASILNFYRTGKHLHVEEMCVLAFSEDELEYWGVDELYLES CCQHXYHQKKEHVFE EIRKEAESLRKGEDEDFGTGSFAKW

Oct.bim. 366 RQRVVDLLEKPTTSMARVLAIVSILFV LSTVALTLNTIPGLKGEGEQEGADNPCLAIVEAVCIGWFTLEYLGRFWASH  
Oct.vul. 399 RQRVVDLLEKPTTSMARVLAIVSILFV LSTVALTLNTIPGLKGEGEQEGADNPCLAIVEAVCIGWFTLEYLGRFWASH  
Sepia 397 RQRVVDLLEKPTTSMARVLAIVSILFV LSTVALTLNTIPGLKGEGEHEGADNPCLAIVEAVCIGWFTLEYLGRFWASH  
Squid 346 RQRVVDLLEKPTTSMARVLAIVSILFV LSTVALTLNTIPGLKGEGEHEGADNPCLAIVEAVCIGWFTLEYLGRFWASH

Oct.bim. 446 NKWKF FKGPLNIIDLLAIMPYFISLGLTETNKSTTEQFQNVRRVQIFRIMRILRILKLARHSTGLQSIGYTLQRSYKHI  
Oct.vul. 479 NKWKF FKGPLNIIDLLAIMPYFISLGLTETNKSTTEQFQNVRRVQIFRIMRILRILKLARHSTGLQSIGYTLQRSYKHI  
Sepia 477 NKWKF FKGPLNIIDLLAIMPYFISLGLTETNKSTTEQFQNVRRVQIFRIMRILRILKLARHSTGLQSIGYTLQRSYKHI  
Squid 426 NKWKF FKGPLNIIDLLAIMPYFISLGLTETNKSTTEQFQNVRRVQIFRIMRILRILKLARHSTGLQSIGYTLQRSYKHI

Oct.bim. 526 GLLMMFLAIGILLFSSLAYFAEKDEPGTKYVSIPE TFWAAAITMTTVGYGDIPTTILGKVVGGVCCICGVLVIALPIPI  
Oct.vul. 559 GLLMMFLAIGILLFSSLAYFAEKDEPGTKYVSIPE TFWAAAITMTTVGYGDIPTTILGKVVGGVCCICGVLVIALPIPI  
Sepia 557 GLLMMFLAIGILLFSSLAYFAEKDEPGTKYVSIPE TFWAAAITMTTVGYGDIPTTILGKVVGGVCCICGVLVIALPIPI  
Squid 506 GLLMMFLAIGILLFSSLAYFAEKDEPGTKYVSIPE TFWAAAITMTTVGYGDIPTTILGKVVGGVCCICGVLVIALPIPI

Oct.bim. 606 IVNNFAEFYKDMRREKALKRKEALERAKRNGSIVSFH SVNLRDAFAKSV DLMVASEVPRNDWDTNSVETKMSMSPPPC  
Oct.vul. 639 IVNNFAEFYKDMRREKALKRKEALERAKRNGSIVSFH SVNLRDAFAKSV DLMVASEVPRNDWDTNSVETKMSMSPPPC  
Sepia 637 IVNNFAEFYKDMRREKALKRKEALERAKRNGSIVSFH SVNLRDAFAKSV DLMVASEVPRNDWDTNSVETKMSMSPPPC  
Squid 586 IVNNFAEFYKDMRREKALKRKEALERAKRNGSIVSFH SVNLRDAFAKSV DLMVASEVPRNDWDTNSVETKMSMSPPPC

Oct.bim. 686 VMRGSNPNTPKLSQGQGTNFNCKENQENPSNTNLLD IDEESLHRMTTQAS-TDTSMQNKFEFPSPDINGMDS DNKGCIE  
Oct.vul. 719 VMRGSNPNTPKLSQGQGTNFNCKENQENPSNTNLLD IDEESLHRMTTQAS-TDTSMQNKFEFPSPDINGMDS DNKGCIE  
Sepia 717 VMRGSNPNTPKLSQGQGTANFDCKENQENPSNTNLLD IDEESLHRMTTQASNEPSLQNFEPSPDAMTDLDCDNKGCIE  
Squid 666 VMRGSNPNTPKLSQGQGTANFDCKENQENPSNTNLLD IDEESLHRMTTQASNEPSLQNFEPSPDAMTDLDCDNKGCIE

Oct.bim. 765 MKTLRQESTASTDTYASCFTHPQSSPSITGRSTDPANQANICVNPLEEPSYQSQLPSYEAVMQCDFANNTSN--SDVTN  
Oct.vul. 798 MKTLRQESTASTDTYASCFTHPQSSPSITGRSTDPANQANICVNPLEEPSYQSQLPSYEAVMQCDFANNTSN--SDVTN  
Sepia 797 MKTLRQESTASTDTYASCFTHPQSSPSITGRPN DAPNANICVNPLEEPSYHGQLPSYEAVMQCDFINSSANQENANIN  
Squid 746 MKTLRQESTASTDTYASCFTHPQSSPSITGRPN DASNANICVNPLEEPSYQQLPSYESVIQSDFINCPNSHENGNI

Oct.bim. 843 YQKAPPLGSAICQSFSGNVNQPSDQIQKID DGLTATWQRNVLISSGTTPSSSVGDVRAQTKIGSHGGAPSTTKTALKR  
Oct.vul. 876 YQKAPPLGSAICQSFSGNVNQPSDQIQKID DGLTATWQRNVLISSGTTPSSSVGDVRAQTKIGSHGGAPSTTKTALKR  
Sepia 877 YQKAPPLGSAVCSFNGSVNRPSDQIQKID DGLTATWQRNVLISSGTTPSSSVGDVRAQTKIGSHGGAPSTTKTALKR  
Squid 826 YQKAPPLGRAVCQSFSGSVNRPSDQIQKID DGLTATWQRNVLISSGTTPSSSVGDVRAQKVGSHGGATMTTKTALKR

Oct.bim. 923 YKSLSGEKHPRFADSQIERTYSSTDNLHRYSRPKLKFRKTSSLS SRLHASPATGKKLANYHLIAHKS AFTLNS TDNKCL  
Oct.vul. 956 YKSLSGEKHPRFADSQIERTYSSTDNLHRYSRPKLKFRKTSSLS SRLHASPATGKKLANYHLIAHKS AFTLNS TDNKCL  
Sepia 957 YKSLSGEKHPRFADPQIERTYSSTDNLHRYSRPKLKFRKASSLS SRLHASPATGKKLANYHLIAHKS DASKGTRGHSM D  
Squid 906 YKSLSGEKHPRFADPQIERTYSSTDNLHRYSRPKLKFRKASSLS SRLHASPATGKKLANYHLIAHKS DSKGTRGHSM D

Oct.bim. 1003 NV-----  
Oct.vul. 1036 NV-----  
Sepia 1037 LCRPRS YRLGIRNTISNRVENAWN SQAEDMTKPKTTPPIPIQSSLLH  
Squid 986 LCRPRS YRLGIRNTISNRVENAWN SQAEDMTKPKTTPPIPIQSSLLH
