# Supplementary material
Source: PubMed Central journal article supplement (PMC5499236)
Supplement: NIHMS863911-supplement-6.pdf [file NIHMS863911-supplement-6.pdf]

## Supplemental Tables

**Table S1. Sequencing data summary, related to STAR methods**

Sequencing data summary for the RNA-seq and DNA-seq results.

| Animal   | Type    | tissue    | paired/single | #reads    | read length | %GC |
|----------|---------|-----------|---------------|-----------|-------------|-----|
| Oct.vul. | RNA-seq | OL        | paired        | 127049529 | 151x2       | 39  |
| Oct.vul. | RNA-seq | SG        | paired        | 126573775 | 151x2       | 39  |
| Sepia    | RNA-seq | OL        | paired        | 159933775 | 151x2       | 39  |
| Sepia    | RNA-seq | SG        | paired        | 131031103 | 151x2       | 40  |
| Nautilus | RNA-seq | OL        | paired        | 188232900 | 151x2       | 41  |
| Nautilus | RNA-seq | Supra     | paired        | 178490917 | 151x2       | 41  |
| Oct.vul. | DNA-seq | Sperm sac | paired        | 498212805 | 101x2       | 35  |
| Sepia    | DNA-seq | Sperm sac | paired        | 500285022 | 101x2       | 33  |
| Nautilus | DNA-seq | Sperm sac | paired        | 503446649 | 101x2       | 35  |

**Table S2. Transcriptome assembly and ORF statistics, related to STAR methods**

Transcriptome assembly statistics, and ORF statistics (based on the longest isoform found for each Trinity “gene”), for the different species.

|                                    | Squid    | Sepia    | Oct.vul. | Oct.bim.  | Nautilus  | Aplysia   |
|------------------------------------|----------|----------|----------|-----------|-----------|-----------|
| <b>Total Trinity 'transcripts'</b> | 151477   | 240756   | 201414   | 271576    | 458827    | 256514    |
| <b>Total Trinity 'genes'</b>       | 107025   | 168878   | 150616   | 207439    | 282627    | 196908    |
| <b>Contig N50</b>                  | 755      | 687      | 784      | 749       | 992       | 1802      |
| <b>Median contig length</b>        | 334      | 323      | 334      | 340       | 352       | 387       |
| <b>Mean contig length</b>          | 573.65   | 543.02   | 579.98   | 574.31    | 662.03    | 869.75    |
| <b>Total assembled bases</b>       | 61395149 | 91704707 | 87354553 | 119133693 | 187107820 | 223102930 |
| <b>Number of ORFs</b>              | 12218    | 14954    | 13005    | 17786     | 11139     | 22951     |
| <b>Number of unique proteins</b>   | 9385     | 10967    | 10218    | 12852     | 8485      | 17283     |
| <b>Mean ORF length</b>             | 1369     | 1155     | 1317     | 1253      | 1392      | 1147      |
| <b>Median ORF length</b>           | 1026     | 780      | 969      | 882       | 999       | 663       |
| <b>Total ORF length</b>            | 16725027 | 17272626 | 17129859 | 22292061  | 15501153  | 26321973  |

**Table S3. Extraordinary extent of A-to-I RNA editing in coleoid cephalopods, related to Figure 1.**

In all species but Oct.bim., the majority of ORFs found contained recoding events. The higher number of ORFs detected and the somewhat lower fraction of edited ORFs in Octopus bim. is due to the different composition of sub-tissues used for transcriptome assembly (OL, sub, supra and ANC, compared with OL and SG for the other species). Re-assembling a transcriptome using only reads derived from the OL sample of Octopus bim. one finds recoding fraction consistent with the other species. This suggests a considerable variation of editing level across neural sub-tissues.

| <b>Animal</b>   | <b>Tissues used</b>        | <b># AG sites</b> | <b>#recoding sites</b> | <b># ORFs found</b> | <b>#ORFs recoded</b> |
|-----------------|----------------------------|-------------------|------------------------|---------------------|----------------------|
| <i>Oct.vul.</i> | <i>OL, SG</i>              | 117842            | 76639 (65%)            | 13005               | 7953 (61%)           |
| <i>Oct.bim.</i> | <i>OL, ANC, sub, supra</i> | 76862             | 50079 (65%)            | 17786               | 6964 (39%)           |
| <i>Oct.bim.</i> | <i>OL</i>                  | 74436             | 48181 (65%)            | 10974               | 6717 (61%)           |
| <i>sepia</i>    | <i>OL, SG</i>              | 130636            | 86230 (66%)            | 14954               | 8537 (57%)           |
| <i>squid</i>    | <i>OL, GFL</i>             | 82975             | 54287 (65%)            | 12218               | 6688 (55%)           |

**Table S8. Multiply recoded proteins, related to Figure 4**

List of 24 proteins containing 5 or more highly edited ( $\geq 10\%$  editing levels) recoding sites that are shared by all 4 coleoid cephalopod species.

| <b>UniProt ID</b> | <b>Protein name</b>                                   | <b># highly edited, 4-species conserved, recoding sites</b> |
|-------------------|-------------------------------------------------------|-------------------------------------------------------------|
| O54774            | AP-3 complex subunit delta-1                          | 5                                                           |
| O60271            | C-Jun-amino-terminal kinase-interacting protein 4     | 5                                                           |
| O95359            | Transforming acidic coiled-coil-containing protein 2  | 6                                                           |
| P09482            | Neuronal acetylcholine receptor subunit alpha-4       | 5                                                           |
| P13395            | Spectrin alpha chain                                  | 8                                                           |
| P23468            | Receptor-type tyrosine-protein phosphatase delta      | 8                                                           |
| P41823            | Synaptotagmin-1                                       | 6                                                           |
| P55162            | Membrane-associated protein Hem                       | 6                                                           |
| Q01484            | Ankyrin-2                                             | 8                                                           |
| Q4KM31            | LIM domain-containing protein 2                       | 5                                                           |
| Q5U239            | Transmembrane protein 145                             | 5                                                           |
| Q6GLR7            | Calcium-dependent secretion activator 1               | 7                                                           |
| Q6GPD0            | Rho GTPase-activating protein 32                      | 5                                                           |
| Q6VNB8            | WD repeat and FYVE domain-containing protein 3        | 8                                                           |
| Q6ZPF3            | T-lymphoma invasion and metastasis-inducing protein 2 | 6                                                           |
| Q7Z3G6            | Prickle-like protein 2                                | 5                                                           |
| Q80U22            | Iporin                                                | 5                                                           |
| Q862Z3            | Uromodulin                                            | 14                                                          |
| Q8N2Q7            | Neuroigin-1                                           | 5                                                           |
| Q96RL7            | Vacuolar protein sorting-associated protein 13A       | 12                                                          |
| Q9I8C7            | Neuronal acetylcholine receptor subunit alpha-10      | 7                                                           |
| Q9I8D1            | Unconventional myosin-VI                              | 9                                                           |
| Q9NGC3            | Centaurin-gamma-1A                                    | 9                                                           |
