# Supplementary material
Source: PubMed Central journal article supplement (PMC5499236)

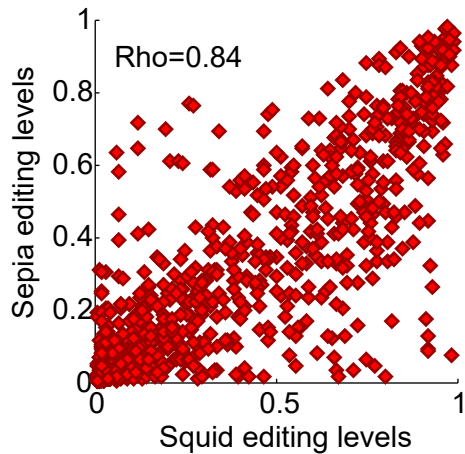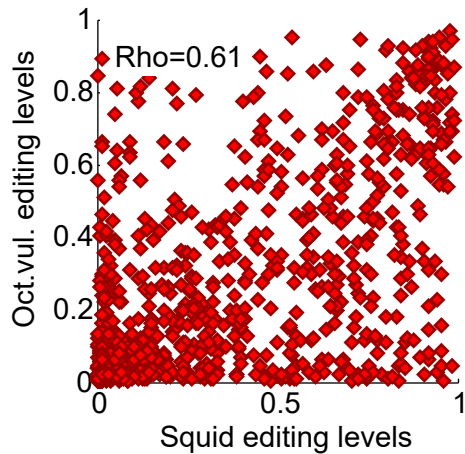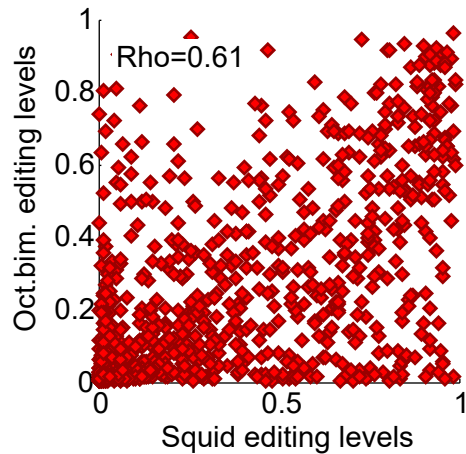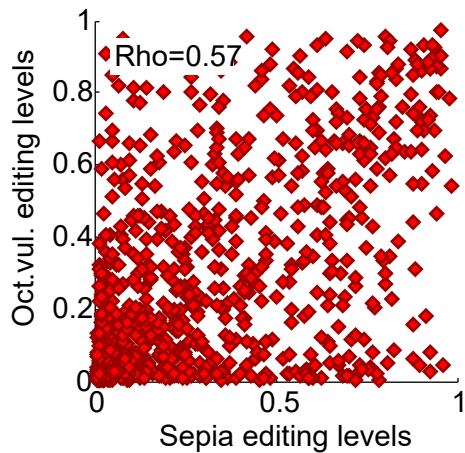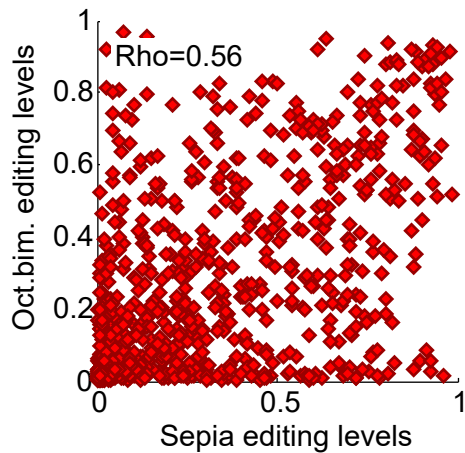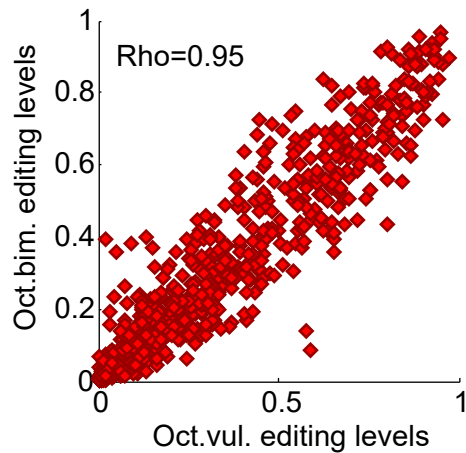

Supplement: NIHMS863911-supplement-1.pdf [file NIHMS863911-supplement-1.pdf]

A

Sepia

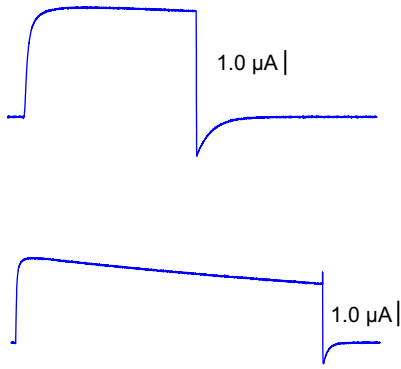

Squid

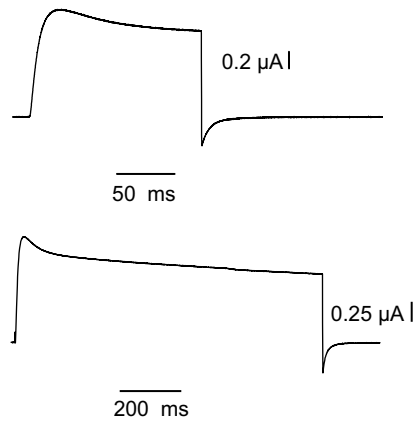

Octopus

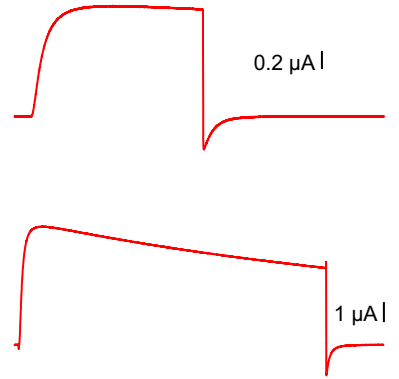

B

Voltage-sensitivity

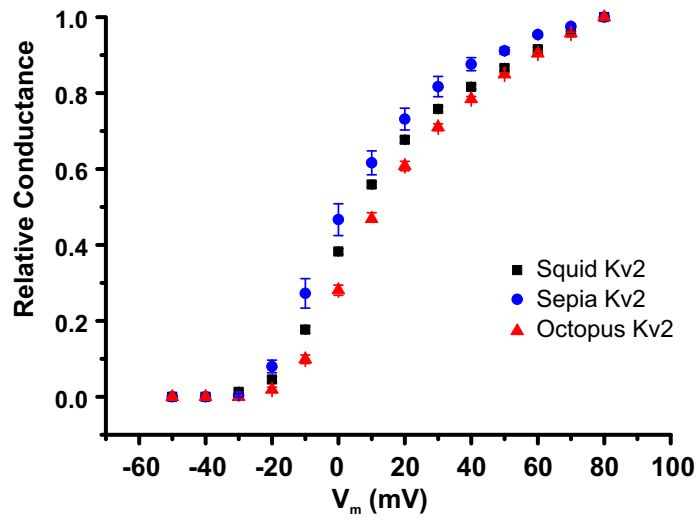

C

Inactivation

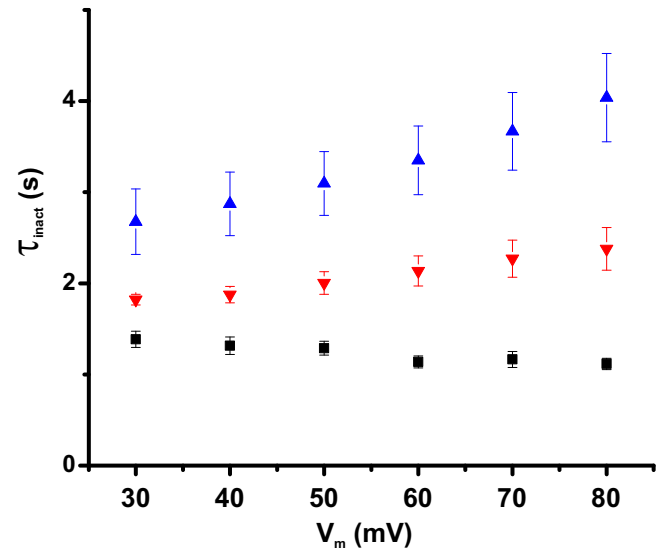

D

Opening

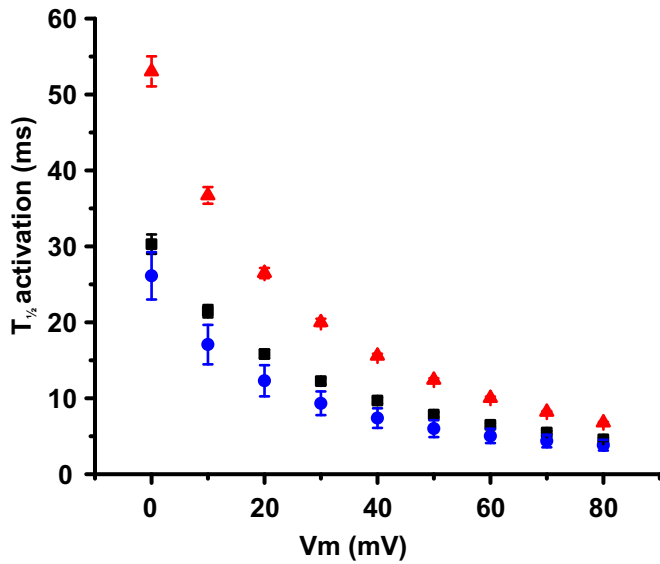

Supplement: NIHMS863911-supplement-3.pdf [file NIHMS863911-supplement-3.pdf]

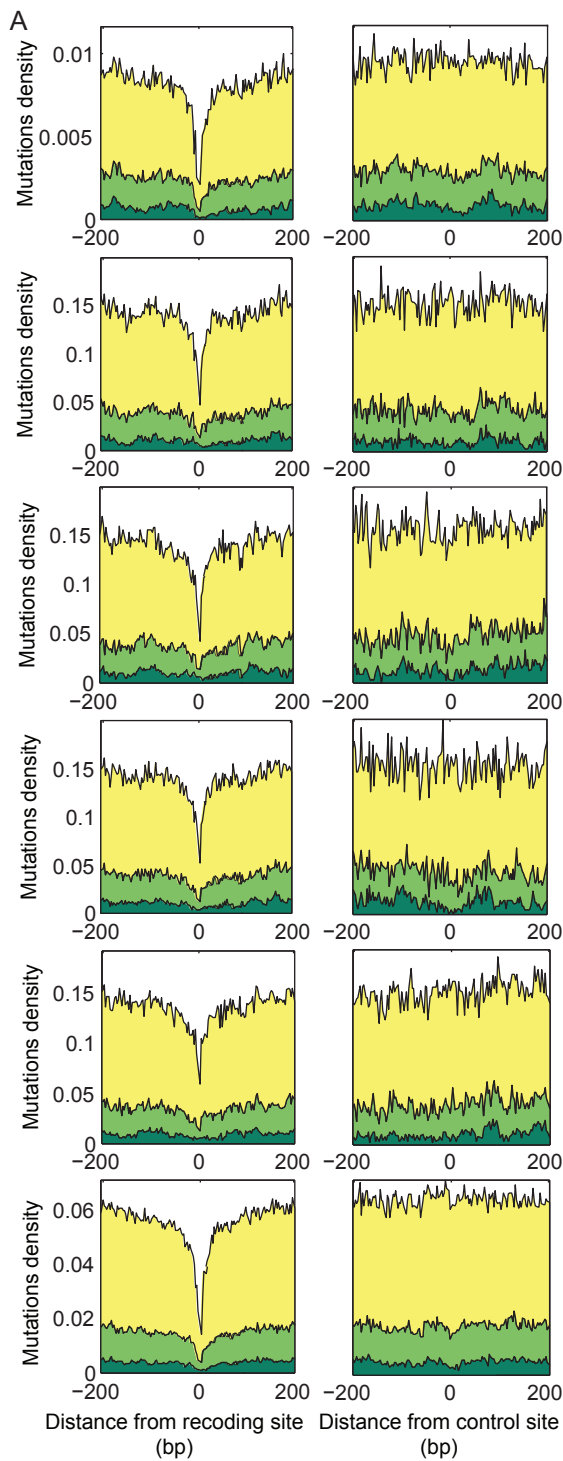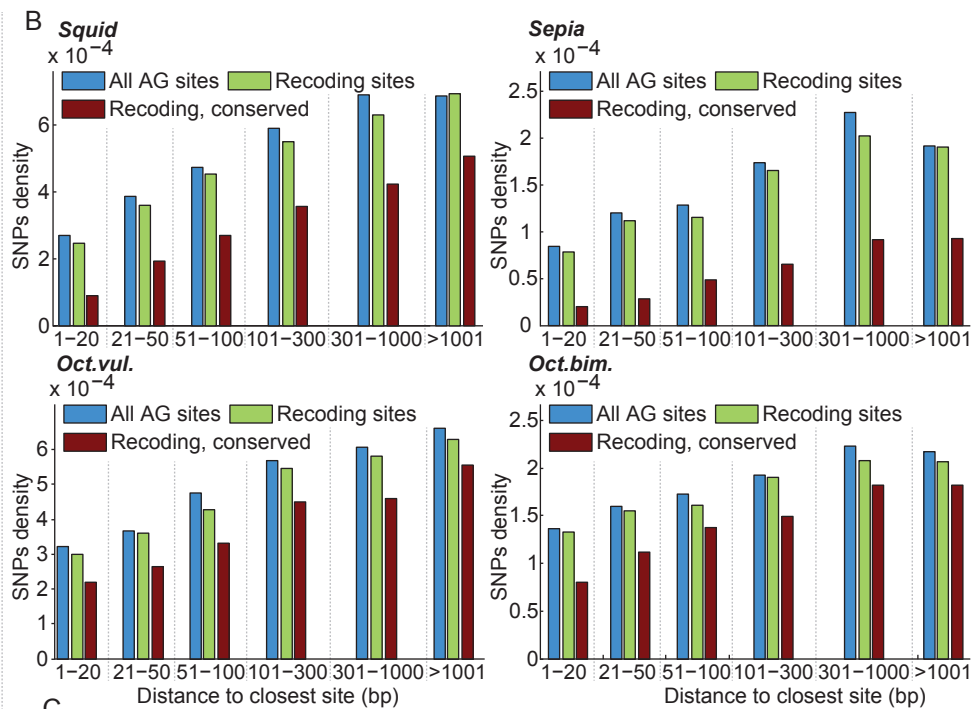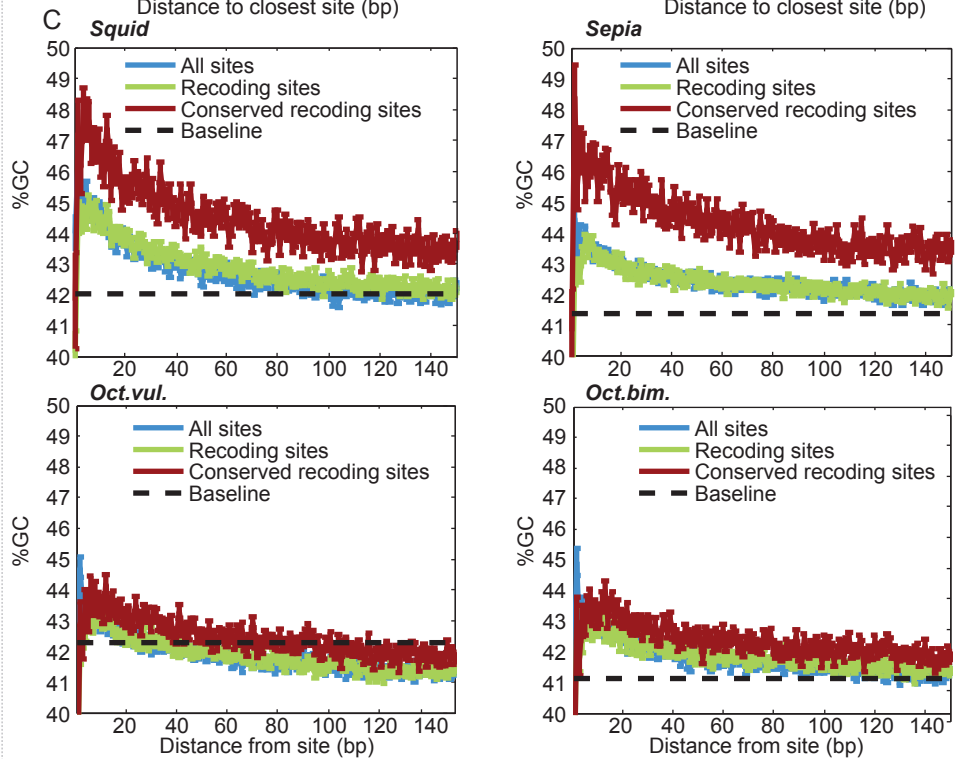

Supplement: NIHMS863911-supplement-4.pdf [file NIHMS863911-supplement-4.pdf]

A

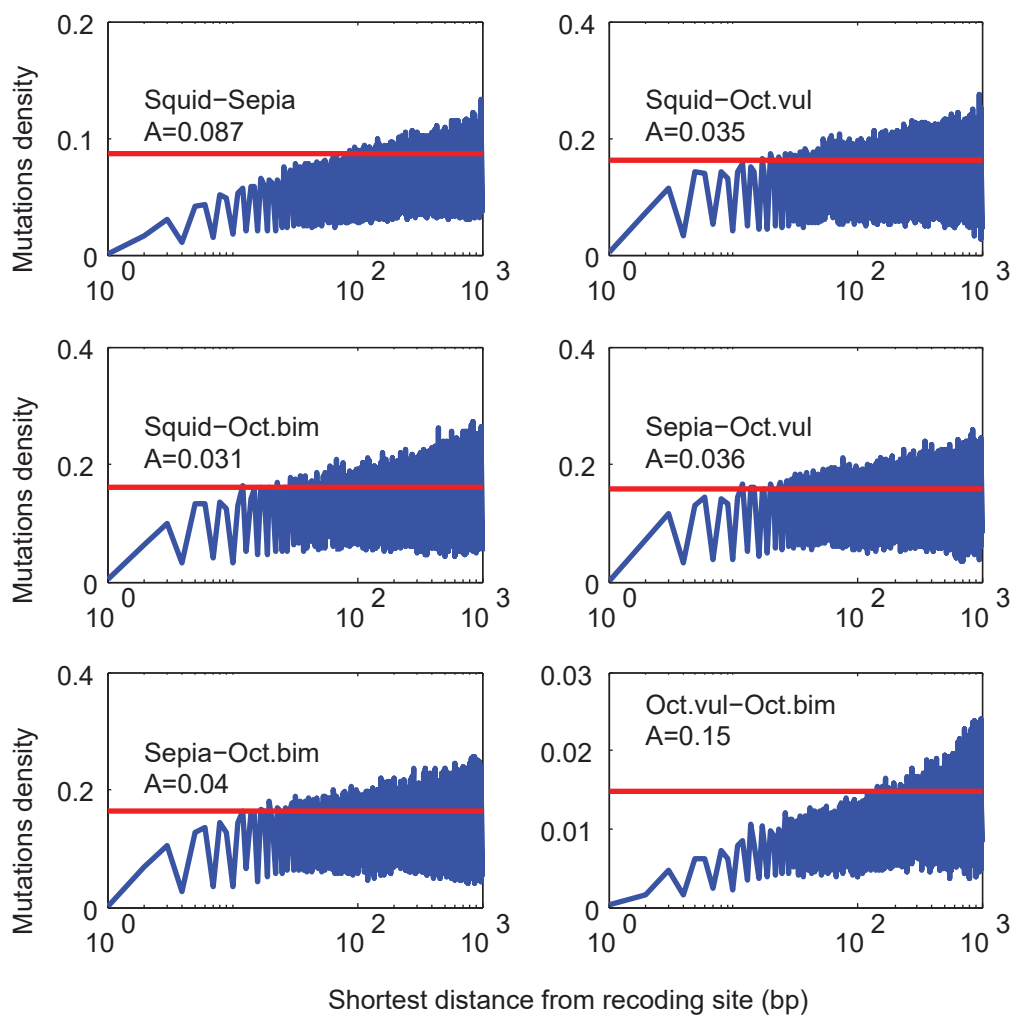

B

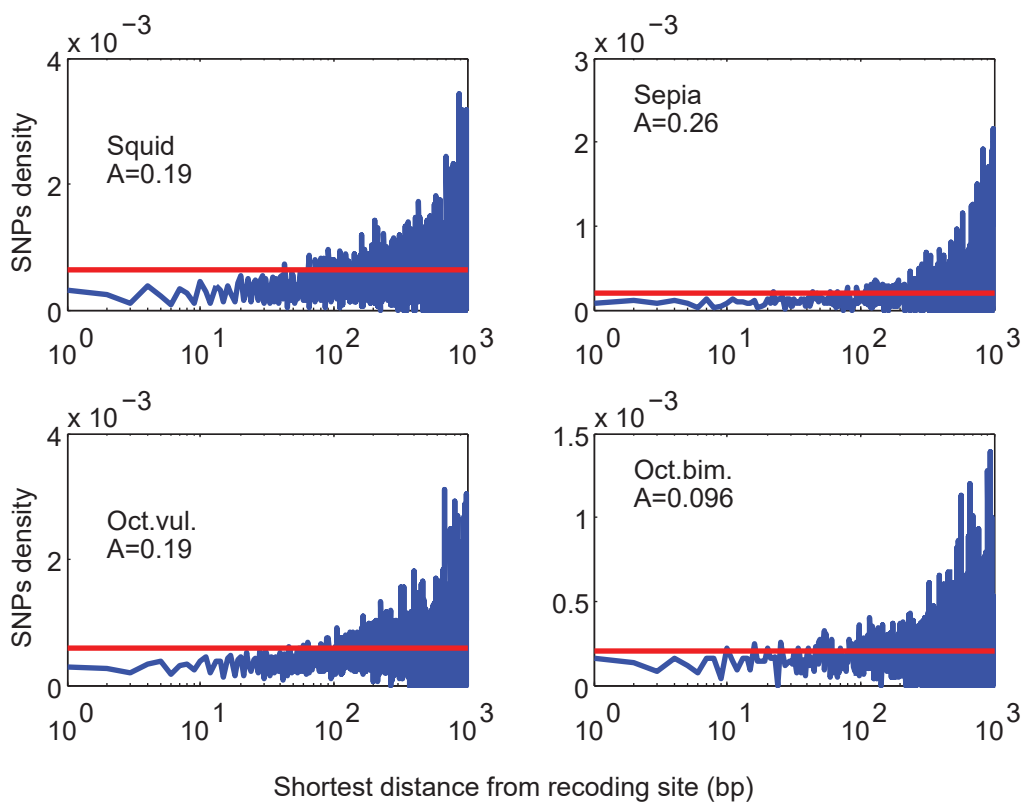

Supplement: NIHMS863911-supplement-5.pdf [file NIHMS863911-supplement-5.pdf]
